# Supplementary material for: Mapping Extracellular pH of Gliomas in Presence of Superparamagnetic Nanoparticles: Towards Imaging the Distribution of Drug-Containing Nanoparticles and Their Curative Effect on the Tumor Microenvironment
Source: Hindawi journal article supplement (doi:10.1155/2017/3849373), 2017-01-01
Supplement: f1 [file 3849373.f1.pdf]

**Figure S1. Prussian Blue Staining for iron (SPIO-NPs) distribution**

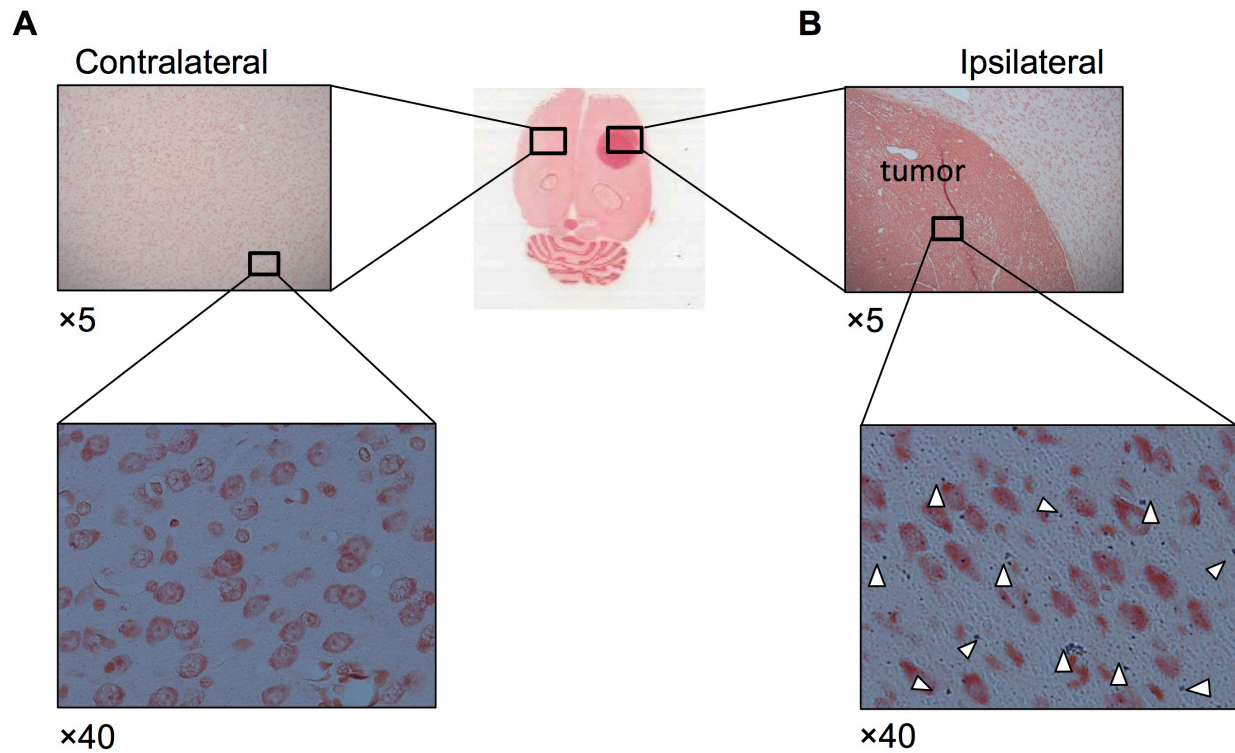

Prussian blue staining for  $\text{Fe}^{3+}$  in 10  $\mu\text{m}$  thick sections of an RG2 glioma-bearing rat that had undergone renal ligation following infusion of SPIO-NPs. **(A)** SPIO-NPs were not observed in the healthy/non-tumor brain tissue on the contralateral side, consistent with the  $R_2$  results from MRI (**Fig. 1C**). **(B)** However, many clusters of SPIO-NPs were observed inside the tumor (blue dots indicated with white arrows), consistent with the  $R_2$  enhancement observed with MRI after the infusion of SPIO-NPs (**Fig. 1C**). Red color indicates nucleus.

**Figure S2. Effect of TmDOTP<sup>5-</sup> and SPIO-NPs infusion on the transverse relaxation rate ( $R_2$ ) in Probenecid-infused glioma-bearing animals**

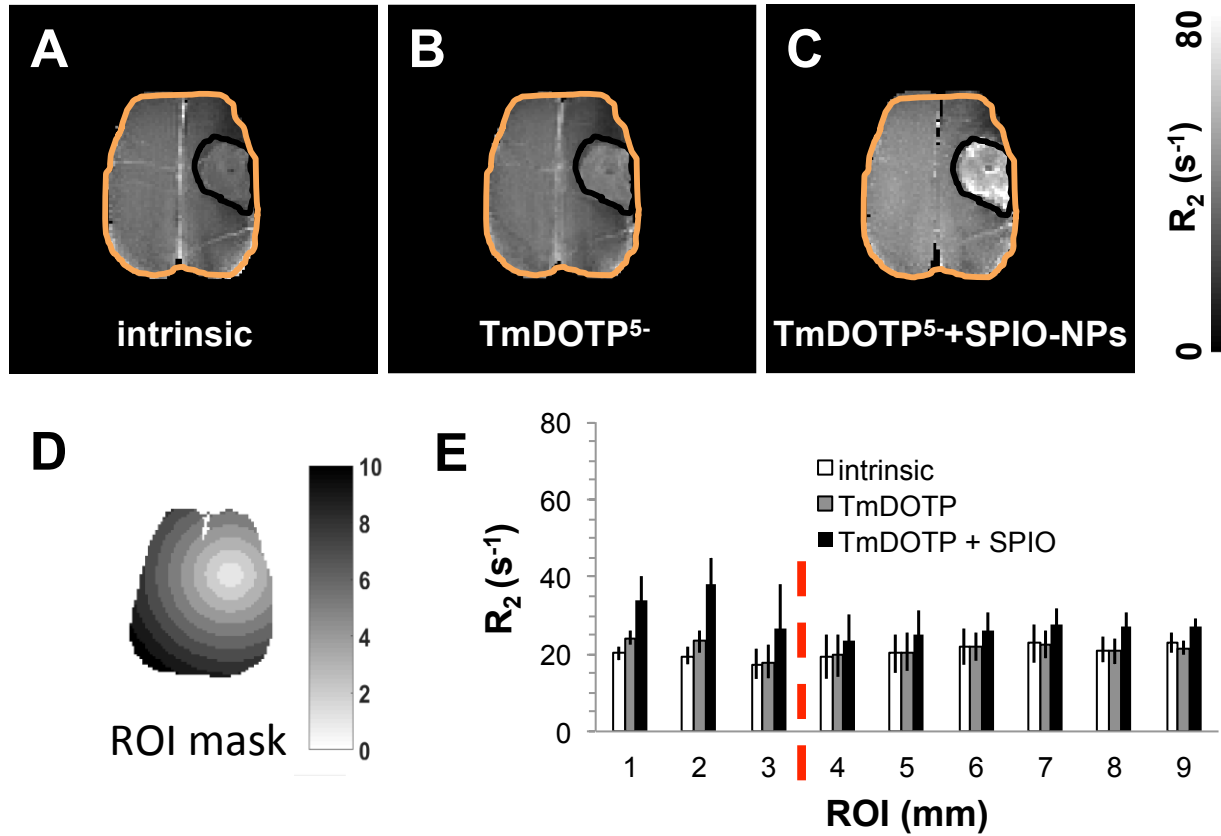

Transverse relaxation rate ( $R_2$ ) maps of an RG2 glioma-bearing rat that underwent co-infusion of probenecid and TmDOTP<sup>5-</sup>, (A) without any contrast agent, (B) after infusion of TmDOTP<sup>5-</sup>, and (C) after infusion of SPIO-NPs. The scale bar in A-C denotes  $R_2$  values from 0 to 80 s<sup>-1</sup>. Compared to the  $R_2$  map before TmDOTP<sup>5-</sup> infusion (A), a slight  $R_2$  enhancement was observed throughout the brain after infusion of TmDOTP<sup>5-</sup> (B), but much greater  $R_2$  enhancement and best tumor delineation was observed following the infusion of SPIO-NPs (C). The contrast enhancement from both TmDOTP<sup>5-</sup> and TmDOTP<sup>5-</sup> with SPIO-NPs was region-specific, with a higher enhancement inside the tumor and lower outside of the tumor (relative to the intrinsic contrast, (A)). The black outline in A-C denotes the tumor boundary, which is based on the MRI contrast after the infusion of SPIO-NPs. The region of interest (ROI) mask based on 1 mm circular rings from the tumor center (D) was used to generate the radial  $R_2$  distribution histogram (E). The scale bar in D denotes 0 to 10 mm diameter circular ROIs (portrayed on a representative rat brain slice). The average  $R_2$  values inside the tumor were 19.1, 21.8 and 32.9 s<sup>-1</sup> before contrast agent infusion, after infusion of TmDOTP<sup>5-</sup>, and after infusion of SPIO-NPs, respectively. For the healthy tissue (contralateral side), the average  $R_2$  values were 21.7, 21.4 and 26.9 s<sup>-1</sup> before contrast agent administration, after infusion of TmDOTP<sup>5-</sup>, and after infusion of SPIO-NPs, respectively. The gray dashed line in E denotes the demarcation between tumor and non-tumor regions. Based on the in vitro relaxivity of Molday ION, the amount of SPIO-NPs in the tumor was 2.1 times greater than in healthy tissue suggesting a preferential extravasation and accumulation in the tumor. See Fig. 1 for an example of  $R_2$  maps of an RG2 glioma-bearing rat that underwent renal ligation for TmDOTP<sup>5-</sup> infusion.

**Figure S3. Extracellular pH ( $pH_e$ ) and TmDOTP<sup>5-</sup> linewidths (LW) measured before and after SPIO-NPs infusion in Probenecid-infused glioma-bearing animals**

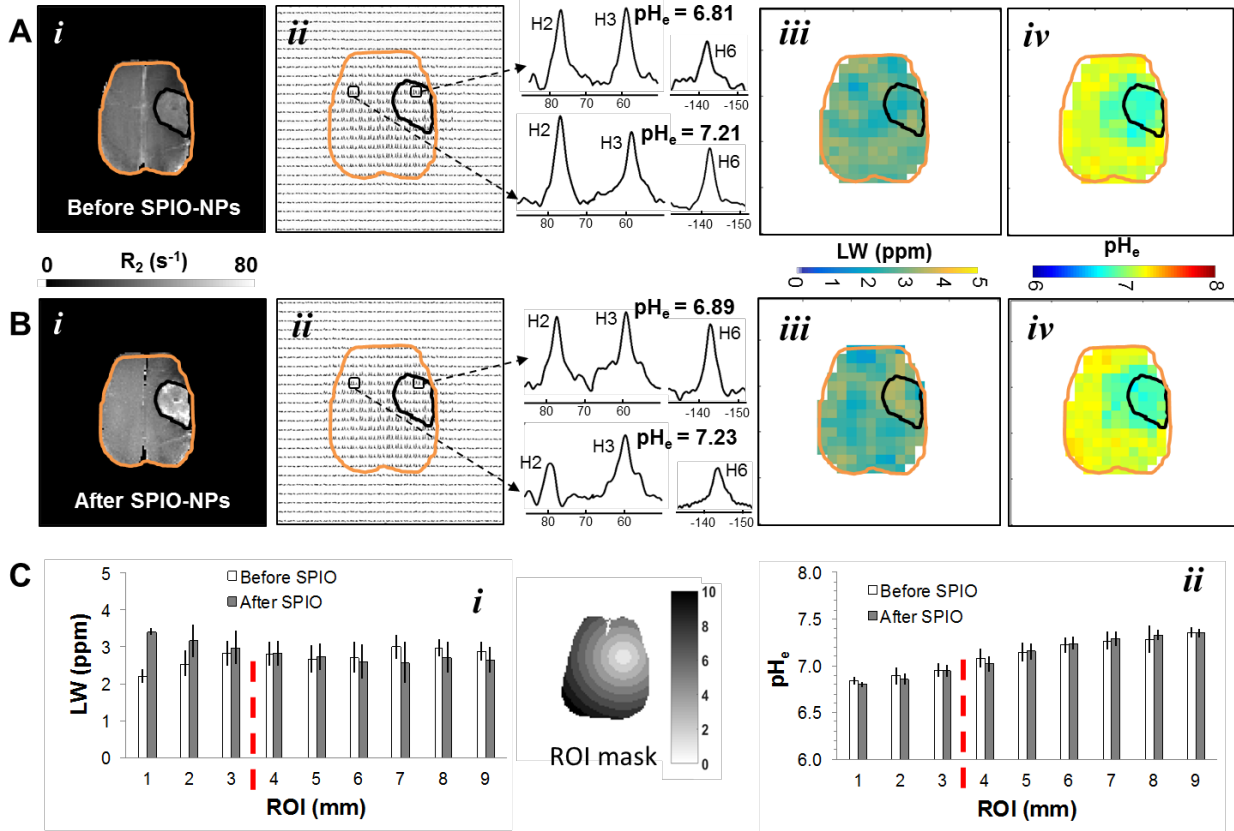

Multi-modal data of relaxation rate ( $R_2$ ) maps, chemical shift imaging (CSI) maps, linewidth (LW), and extracellular pH ( $pH_e$ ) maps obtained for the same RG2 tumor-bearing rat, which had undergone co-infusion of TmDOTP<sup>5-</sup> and probenecid. **(Ai-iv)** represents maps before the SPIO-NPs infusion while **(Bi-iv)** represents the maps after the infusion. The  $R_2$  maps were used to delineate and localize the tumor (black outline) and brain (orange outline) boundaries on the CSI, LW, and  $pH_e$  maps.  $R_2$  values inside the tumor increased significantly after infusion of SPIO-NPs. The CSI maps were used to create the LW maps (based on the H6 peak of TmDOTP<sup>5-</sup>) and  $pH_e$  maps. The LW increased after infusion of SPIO-NPs especially in the tumor. The  $pH_e$  within the tumor core and on the tumor margin was lower than healthy/non-tumor regions. The panels between the CSI and the LW maps show examples of <sup>1</sup>H spectra of TmDOTP<sup>5-</sup> protons from voxels inside and outside the tumor, revealing a significant intratumoral and peritumoral LW and  $pH_e$  difference. A more detailed comparison was done using a region of interest (ROI) analysis of LW **(Ci)** and  $pH_e$  **(Cii)** maps before and after the infusion of SPIO-NPs, using the mask shown. The scale bar in the mask denotes 0 to 10 mm diameter circular ROIs (portrayed on a representative rat brain slice). The red dashed line denotes the demarcation between tumor and non-tumor regions. The average  $pH_e$  before infusion of SPIO-NPs was  $6.85 \pm 0.03$  within the tumor, and  $pH 7.15 \pm 0.06$  for healthy tissue **(Aiv)**. The  $pH_e$  measured after infusion of SPIO-NPs was  $pH 6.86 \pm 0.07$  within the tumor and  $pH 7.17 \pm 0.06$  in the healthy tissue **(Biv)**. The  $pH_e$  of the tumor edge (ROI 4) was also relatively acidified ( $pH 6.98 \pm 0.13$  before and  $6.90 \pm 0.09$  after infusion of SPIO-NPs) compared to healthy tissue farthest from the tumor core (ROIs 5-9). See **Fig. 2** for an example of multi-modal data of an RG2 tumor rat that underwent renal ligation.

**Figure S4. Comparison of Extracellular pH ( $pH_e$ ) in 9L tumor-bearing animals that underwent renal ligation or Probenecid co-infusion to inhibit renal clearance**

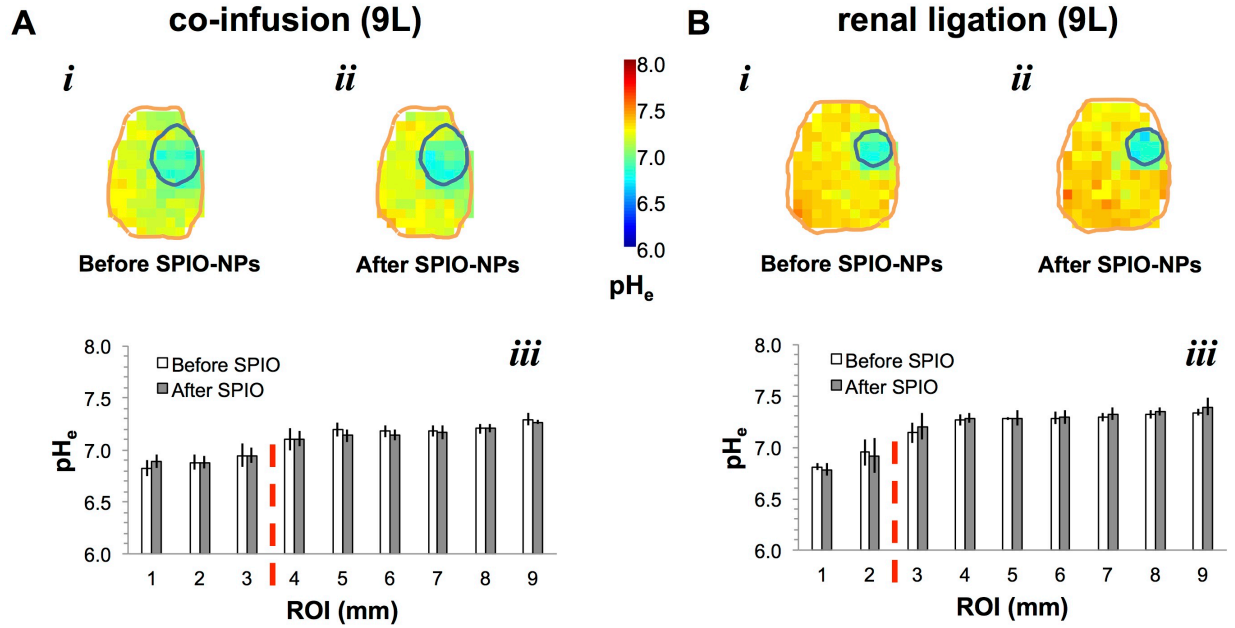

Comparison of  $pH_e$  maps for 9L tumors before and after infusion of SPIO-NPs in rats that underwent **(A)** co-infusion of TmDOTP<sup>5-</sup> and probenecid and **(B)** infusion of TmDOTP<sup>5-</sup> after renal ligation. In both **A** and **B**, **(i)** and **(ii)** represents the  $pH_e$  maps before and after SPIO-NPs infusion, respectively, while **(iii)** depicts a detailed ROI analysis. See [Fig. 1](#) for details of the ROI mask. In both **A** and **B**, the  $pH_e$  inside the tumor was lower (acidified) compared to healthy/non-tumor tissue, but the acidification was restricted to the MRI-defined tumor core only. See [Fig. 4](#) for a comparison of regional  $pH_e$  dependence in RG2 versus 9L tumors in rats that underwent co-infusion of TmDOTP<sup>5-</sup> and probenecid.
